# Supplementary material
Source: publisher site journal article supplement (https://static.cambridge.org/content/id/urn:cambridge.org:id:article:S1368980019000958/resource/name/S1368980019000958supp001.docx)
Supplement: Supplementary file 1 [file S1368980019000958supp001.docx]

**Supplemental Table S1.** NDSR food/beverage groups that comprise the 11 food/beverage groups used in the principal factor analysis for each COPTR study

| **Factor variable** | **Food/beverage items** |
| --- | --- |
| Fruits | Citrus and non-citrus fruits |
| Non-starchy vegetables | Dark-green vegetables, deep-yellow vegetables, tomatoes, vegetable juice, and other vegetables |
| Starchy vegetables | White potatoes, other starchy vegetables, and legumes |
| Dairy foods | Cheese and yogurt |
| Meats | Beef, veal, lamb, fresh pork, poultry, fish, cold cuts and sausage, cured pork, game, organ meats, and baby food meat mixtures |
| Non-meat proteins | Eggs, egg substitutes, nuts and seeds, nuts and seed butters, and meat alternatives |
| Grains | Grains/flour/dry mixes, breads, pasta, ready-to-eat cereals, and baby food grain mixtures |
| Savory snacks | Crackers; snack chips; snack bars; popcorn; and fruit-, vegetable-, and meat-based savory snacks |
| Desserts | Cakes/cookies/pies/pastries/Danish/doughnuts/cobblers, frozen desserts, puddings and other dairy desserts, chocolates, candy, frosting/glaze, sweet sauces, other desserts, and baby food desserts |
| Unsweetened milk | Dairy and nondairy unsweetened varieties |
| SSBs | Sweetened flavored milk beverage powder, sweetened coffee, sweetened coffee substitutes, sweetened fruit drinks, sweetened soft drinks, sweetened tea, sweetened water, sweetened meal replacements/supplements, citrus fruit juice, non-citrus fruit juice, and ready-to-drink flavored milk |
| *Omitted items* | *Fried fruits and vegetables, artificially sweetened beverages, unsweetened beverages, water, added fats and sugars (margarine, oil, shortening, butter and other animal fats, sugar, syrup/honey/jam/jelly/preserves, sugar substitutes), and condiments* |

NDSR, Nutrition Database System for Research; COPTR, Childhood Obesity Prevention and Treatment Research
